# Supplementary material for: Follistatin-Like 1 Is Downregulated in Morbidly and Super Obese Central-European Population
Source: Dis Markers. 2018 Nov 22;2018:4140815. doi: 10.1155/2018/4140815 (PMC6282119; doi:10.1155/2018/4140815)
Supplement: Supplementary Materials — Supplementary 1: contains raw data used for our analysis. [file 4140815.f1.xlsx]

## Sheet: List1
sample	sex	FSTL1 level	genotype	obesity status	height	weight	BMI	age	Systolic blood pressure	Diastolic blood pressure	Triceptal skinfold thickness	Biceptal skinfold thickness	Supraspinal skinfold thickness	Subscapular skinfold thickness	Total body fat	Total body water	Hip circumference	Waist circumference	Hip waist ratio
OB001	female	0.719	TT	non-ob	161	53.5	20.6396	33	120	78	19	17	13	17	32.2	49	70	96	0.729167
OB003	female	1.378	GG	ob	169	180.3	63.128	58.6	160	110					57.6	35.9	157	180	0.872222
OB010	female	7.138	GT	ob	160	114.4	44.6875	60.6	139	93	25	22		34	53.5	36.7	139	131	1.06107
OB013	female	7.153	GT	ob	170	119.8	41.4533	56.5	141	101	32	22	34	36	53.9	35	119	142	0.838028
OB017	female	0.608	GG	ob	157	97	39.3525	52.7	148	88	32	29	15	32	47.8	41.1	116	121	0.958678
OB021	female	0.919	GG	ob	166	109	39.5558	49.4	141	95	31	16	22	26	48.6	38.9	112	124	0.903226
OB023	male	1.744	GG	ob	176.5	157.1	50.4297	46.2	127	78	28	19		29	42.2	44.7	149	147	1.01361
OB029	female	1.225	GG	ob	173	158.2	52.8584	55.3	145	90	32	26	36	29	53.2	37.9	137	156	0.878205
OB032	female	15.821	GT	ob	168	118.5	41.9855	47.8	133	90	30	14	22	36	51	36.9	113	139	0.81295
OB036	male	0.674	GG	ob	188.5	183.3	51.5869	49.7	155	112	14	15	40		47.2	40.2	162	149	1.08725
OB037	female	2.853	GG	ob	167	164.7	59.0555	54.9	140	95	31	30	54	35	59.7	33.2	147	156	0.942308
OB038	female	2.814	TT	ob	160	107.9	42.1484	53.6	139	89	32	23	35	29	52.3	37.3	123	125	0.984
OB041	male	0.33	TT	non-ob	166	69.2	25.1125	63.7	127	87	16	9	16	20	24.9	59.1	89	98	0.908163
OB042	female	1.161	GT	ob	168	135.6	48.0442	54.9	163	103	33	32	35	38	55.1	35.4	135	145	0.931034
OB045	female	0.533	GT	ob	164	113.4	42.1624	58.8	122	82	30	22	31	32	54.6	35.3	128	141	0.907801
OB046	female	3.595	TT	ob	166	145.9	52.9467	34.6	130	90	33	29	38	44	53.5	36.2	142	132	1.07576
OB056	female	0.74	GT	ob	162.5	113	42.7929	30.1	125	95	28	22	28	35	50.4	36.3	123	133	0.924812
OB064	female	0.329	TT	ob	152	94.6	40.9453	51.2	136	115	29	23	30	32	48.8	41	116	122	0.95082
OB066	female	3.03	TT	ob	158	116.3	46.5871	59.3	183	134	32	28	24	27	52.5	38.9	121	138	0.876812
OB068	female	1.669	TT	ob	177	127.5		35.1	120	72	26	24	36	28	44.2	40.9	122	126	0.968254
OB069	male	1.326	TT	ob	171.5	124	42.1593	60.8	156	99	37	40	43	40	40.6	45.5	142	124	1.14516
OB071	female	2.183	GG	ob	156.5	134.8	55.0378	53.1			45	44		46	59.4	32.9	130	160	0.8125
OB072	male	20.692	GT	ob	178	165.6	52.2661	17.6	158	110	35	33	42	34	45.1	39.3	131	148	0.885135
OB078	male	1.513	GG	ob	165	137.1	50.3581	67.8	110	82	41	24	42	39	41.8	47.8	139	147	0.945578
OB085	male	0.942	GT	ob	173	142	47.4456	51.2	111	76	19	17	40	28	45.9	39.9	154	136	1.13235
OB102	female	10.687	GT	ob	173	127.3	42.534	44	158	108	34	27	36	34	43.6	43	118	132	0.893939
OB103	female	19.279	GG	ob	166.5	116.1	41.8797	49.8	145	101	32	31	27	38	44.6	43.2	115	131	0.877863
OB104	female	0.623		ob	160	106.7	41.6797	50.3	155	103	24	19	20	25	51.6	37.4	118	139	0.848921
OB108	female	1.393		ob	153	95.5	40.7963	62.5	152	77	32	22	28	22	50.9	40.5	110	125	0.88
OB111	female	0.691	GT	ob	163.5	113.2	42.3459	53.5	161	119	35	25	36	26	49.4	39.6	117	139	0.841727
OB114	female	9		non-ob	162.5	63	23.858	42.6	119	82	28	14	16	17	30.5	51.7	75	103	0.728155
OB117	female	72.786	GG	non-ob	161	62.8	24.2275	43	114	72	13	11	13	14	25.4	56.9	79	94	0.840426
OB129	female	1.903	GG	ob	167.5	119.8	42.6999	46.9	177	97	39	25	29	26	48.5	39.4	129	140	0.921429
OB130	male	0.94	TT	ob	186	135.7	39.2242	52.8	148	112	21	19	45	29	40.4	41.8	142	122	1.16393
OB141	female	2.267	TT	ob	165	110	40.404	66.9	160	81	26	16	26	31	50.5	39.5	120	127	0.944882
OB143	female	5.456	GT	ob	157.5	98.4	39.6674	64.2	154	96	33	24	23	31	53.5	37.6	124	132	0.939394
OB154	male	80.487	GG	ob	176	125	40.3538	43.6	150	102	22	19	37	42	34.7	47.9	130	117	1.11111
OB158	female	83.578	GG	ob	159	115.3	45.6074	61.1	137	82	35	27	45	34	54.4	37.1	133	145	0.917241
OB159	female	1.274	GT	ob	165.5	116	42.3508	41.4	125	82	43	34	36	37	51.1	36.6	122	131	0.931298
OB162	female	14.415	GG	ob	162.5	112.8	42.7172	53.1	154	107	38	25	38	44	55.2	34.6	125	138	0.905797
OB170	female	2.87	GG	ob	148.5	94.2	42.7167	73.2	148	80	32	26	29	47	53.1	41.2	113	127	0.889764
OB173	female	3.473		non-ob	165.5	66.1	24.1327	57.3	139	91	25	13	24	27	36.3	48.7	89	103	0.864078
OB177	female	0.899	GG	ob	153.5	98.9	41.9739	63.6	145	94	30	21	31	35	52.3	39.6	120	132	0.909091
OB178	female	27.059	TT	ob	162.5	105.4	39.9148	57.4	134	86	40	31	21	31	50.4	38.8	104	127	0.818898
OB179	male	11.579	GT	ob	181.5	141.1	42.8325	51.1	130	92	30	17	26	30	36.6	48.3	137	128	1.07031
OB186	female	10.81	GT	non-ob	163	56.3	21.1901	41.6	116	58	15	14	22	16	24.9	56.9	80	90	0.888889
OB192	female	0.2	GG	ob	162.5	118.5	44.8757	48.9	111	79	36	25	34	48	52.1	37.4	121	140	0.864286
OB197	male	2.937	GT	ob	177	129	41.1759	64.1	148	114	33	32	45	43	44.3	40.4	133	130	1.02308
OB199	female	1.468	GT	non-ob	156.5	61.4	25.0692	37.9	119	76	19	12	18	19	30.8	52.1	76	97	0.783505
OB204	female	13.796	GT	ob	165.5	122.6	44.7605	39.8	139	101	32	17	28	24	48.4	39.4	112	139	0.805755
OB207	female	8.121	GT	ob	177	171.7	54.8055	35.5	132	105	35	50	35	40	56.6	33.6	131	158	0.829114
OB210	female	12.687	TT	ob	151.5	91.2	39.7347	60.4	203	106	25	13	22	18	51.4	40	106	127	0.834646
OB211	female	0.418		ob	166	126.4	45.8702	61.1			45	42	35	47	55.3	33.1	115	131	0.877863
OB214	female	11.439	GG	ob	169.5	118.5	41.2457	46.7	142	103	38	35	39	40	45.4	41.7	112	132.5	0.845283
OB222	female	8.94	TT	ob	160.5	112.2	43.5555	54.8	131	99	34	34	37	37	51.3	38.5	124	125	0.992
OB228	female	0.323	TT	ob	163	150.7	56.7202	59.2	146	89	37	34	39	37	56.4	36.6	137	160	0.85625
OB238	female	59.833		ob	159.5	115	45.204	56.5	111	64	32	27	38	49	56.2	35	120.5	136	0.886029
OB261	female	0.638	GG	ob	169.5	144.2	50.191	57.6	126	74	32	43	65	41	55.7	35.6	137	177	0.774011
OB262	female	0.95		ob	162	139.4	53.1169	33.5	126	89	35	38	45	55	54.9	35	121.5	148	0.820946
OB264	female	1.653	GT	non-ob	165.5	61.9	22.5993	33.1	109	80	26	12	14	10	26.3	52.9	68	101	0.673267
OB269	female	1.92	TT	ob	174	143.6	47.4303	40	135	88	30	27	40	58	47.6	40.3	131.5	145	0.906897
OB271	male	0.457	TT	ob	170.5	126.6	43.5497	58.1	139	83	30	29	50	37	38.7	47.3	131	138	0.949275
OB275	female	3.798	GT	non-ob	171	67.8	23.1866	49	125	75	17	10	12	23	35.3	46.5	86	100	0.86
OB280	female	0.774	GT	ob	147.5	119.3	54.8348	57.9			50	48	40	53	58.4	36	143	136	1.05147
OB283	female	26.137		ob	160	123.1	48.0859	57.7	173	111	33	32	30	55	57.1	34.5	133	144	0.923611
OB285	female	1.136	GT	ob	158.5	130.2	51.8266	52.1	172	116	43	25		32	55.6	36.1	122	146.5	0.832765
OB297	female	3.558	GT	ob	163	110.2	41.4769	32.4	127	87	32	25	48	45	47.9	38.3	113	136	0.830882
OB298	female	2.067	GT	non-ob	161.5	56.6	21.7006	24.4	109	79	23	17	16	17	26.4	52.3	73	94	0.776596
OB299	female	40.803	GG	non-ob	163.5	58.6	21.9211	59.5	102	70	20	10	20	10	32.9	53.4	74	95	0.778947
OB304	female	0.836	GT	ob	160.5	109.1	42.3521	61.3	141	79	32	23	27	30	51.6	38.9	127.5	139	0.917266
OB305	male	1.002	GT	non-ob	176	77.2	24.9225	40	139	101	13	8	9	12	17	60.1	88	97	0.907216
OB308	female	19.997	GT	non-ob	161	62.6	24.1503	48.9	137	95	25	20	13	14	30.3	53.7	82	101	0.811881
OB315	female	16.999	GG	non-ob	172	57.6	19.47	30.8	132	80	22	9	17	12	15.4	60.5	66	96	0.6875
OB322	female	2.386	GT	ob	169.5	120.5	41.9419	58.5	148	94	24	19	16	24	51.1	38.1	120	134	0.895522
OB333	female	0.567	GT	non-ob	165	66.8	24.5363	31	126	85	15	17	16	19	30.4	48.7	84	105	0.8
OB341	female	3.481	GT	ob	169.5	129.5	45.0744	50.9	145	87	37	36	32	42	52.8	36.4	125	132	0.94697
OB342	female	28.185	GG	ob	160.5	110	42.7014	54.3	149	93	38	31	28	41	52.4	37.5	121	129	0.937984
OB345	female	67.44	TT	non-ob	162	61.5	23.4339	39.4	141	96	33	15	14	17	31	50.6	75	96	0.78125
OB346	male	2.136	TT	non-ob	181.5	79.9	24.2546	41.8	130	66	20	5	11	13	11.5	65.6	84	100	0.84
OB347	female	19.622	GT	non-ob	171.5	61.2	20.8077	31.5	119	87	20	8	12	12	21.7	55	74	96	0.770833
OB353	male	3.924	GG	non-ob	185	73.6	21.5047	30.8	115	83	12	6	5	11	10.2	63.7	77	96	0.802083
OB358	female	0.745	GG	non-ob	166	68.1	24.7133	45.2	103	71	16	9	12	13	30.8	51	82	102	0.803922
OB359	female	182.468	GG	non-ob	163.9	64	23.8244	53.2	131	96	19	10	19	16	30.9	53	80	96	0.833333
OB360	male	6.4	GG	non-ob	179.3	81.7	25.4133	28.5	133	81	13	11	11	21	20.1	53.4	91	101	0.90099
OB361	male	167.119		non-ob	170.8	73.5	25.1948	30.8	128	81	13	5	13	18	17.1	58.2	84	98	0.857143
OB362	female	34.763	GT	non-ob	147.9	55.5	25.3721	60.3	150	85	18	16	16	23	49.4	43.4	84	97	0.865979
OB364	female	1.468	GT	non-ob	175	62.9	20.5388	28.1	111	79	14	12	9	11	24.5	50.9	69	99	0.69697
OB365	female	1.942	TT	non-ob	167.3	61	21.7941	47.8	98	63	15	13	15	17	33.9	48.7	76	100	0.76
OB367	female	32.326	GG	non-ob	174	69.5	22.9555	41.7	100	62	13	14	12	15	25.8	52.8	73	100	0.73
OB368	male	13.938	TT	non-ob	177.7	72.2	22.8645	40	105	74	14	13	11	14	19.1	57.5	79	99	0.79798
OB369	female	5.106	GT	non-ob	169.5	66.5	23.1463	32.4	120	76	19	14	18	21	27.4	50.7	81	100	0.81
OB370	male	2.051	GT	non-ob	166.5	59.1	21.3186	51.2	115	67	10	5	9	14	20	64.3	72	88.5	0.813559
OB371	female	434.422	GG	non-ob	182	79.2	23.9102	39.9	116	79	25	13	20	26	30.8	47.1	84	111	0.756757
OB372	female	1.765	GT	non-ob	159	61	24.1288	55.8	157	103	22	12	15	11	34	52	85	101	0.841584
OB373	female	1.39	GT	non-ob	167.2	57.7	20.6397	40.7	112	72	25	10	6	11	21.1	58.4	76	97	0.783505
OB375	female	0.66		non-ob	161.5	55.8	21.3939	37.1	125	78	17	9	9	11	24.2	57	66.5	96	0.692708
OB376	female	0.871		non-ob	161.8	66.3	25.3254	44.5	111	94	18	21	17	28	35.6	47.8	82.6	102.8	0.803502
OB379	female	0.522	GT	non-ob	170.7	73.2	25.1214	56.2	104	75	24	14	22	23	32.2	50.8	88	107	0.82243
OB380	male	1.79	GT	ob	181	142	43.3442	50.3	138	101	30	34	19	40	42	42	132	127	1.03937
OB384	female	5.709	GT	non-ob	170.6	56	19.2411	44.1	101	70	13	6	11	13	25.4	55.4	73	94	0.776596
OB387	male	5.305	GT	non-ob	188	85	24.0493	30.4	112	68	18	9	14	17	20	52	97	104	0.932692
OB391	female	0.648		non-ob	163.8	65.6	24.4498	33.5	98	66	19	13	12	20	25.3	54.3	79	99.5	0.79397
OB398	female	0.896	GT	non-ob	166.5	69.7	25.1423	23.2	90	55	17	15	13	21	28.8	48.5	82.5	100	0.825
OB404	male	1.733	TT	ob	175.5	178.7	58.019	47.4	162	99	32	27			46.2	43.6	159	145	1.09655
OB406	female	13.226	TT	ob	168.6	122.3	43.0241	27.7	119	82	22	18	22	23	60.3	26.4	113	137	0.824818
OB407	male	3.815	TT	non-ob	188.9	90.3	25.306	29.1	128	80	11	8	10	14	16.4	56.9	90	110	0.818182
OB419	female	4.187	TT	non-ob	157	57.4	23.2869	33.8	100	75	25	11	6	13	29.3	52.4	71	93	0.763441
OB420	female	0.928	GT	non-ob	160	58.5	22.8516	33.8	111	75	16	11	10	14	29.7	51.1	72	96	0.75
OB422	female	1.285	TT	ob	174.5	122.2	40.131	39.8	143	97	35	19	25	31	50.3	35.8	115	129	0.891473
OB438	female	4.528	TT	non-ob	161.5	51.8	19.8602	31.1	123	85	24	8	12	15	25.9	54.8	63	93	0.677419
OB448	female	1.805	TT	ob	158	103.7	41.5398	68.6	154	99	33	22	25	28	54.1	37.6	107	127	0.84252
OB449	female	18.942	TT	ob	159.7	101.6	39.8367	58.5	150	96	31	24	21	21	48.2	41.1	128	126	1.01587
OB456	male	0.387		ob	176.2	123.5	39.7791	71.4	162	85	29	26	18	22	34.1	52.5	129	135	0.955556
OB461	female	0.28	GG	ob	178.5	99.7	31.2909	40.7	133	92	27	26	24	32	28	52.6	93	115	0.808696
OB462	male	14.103	GT	non-ob	187.6	102.5	29.1245	41.4	124	87	13	14	13	22	15.9	61.9	103	106	0.971698
OB468	female	17.121	GT	ob	164.6	113.6	41.9294	31.8	114	84	31	20	30	41	50.3	36.2	117	131	0.89313
OB472	female	374.243	GG	non-ob	165.6	65.4	23.8483	51.7	110	71	22	20	13	15	32.4	50.8	79	103	0.76699
OB474	female	15.56	TT	non-ob	178	60	18.937	27.3	103	79	15	9	10	10	19.2	54.8	67	92	0.728261
OB476	female	0.665	GG	ob	175.5	100.7	32.6945	54.5	124	82	33	18	15	29	44.7	40	101	122	0.827869
OB482	female	0.445	GT	non-ob	168.3	54.1	19.0998	25.9	91	59	11	7	5	7	19	57.3	62.5	92	0.679348
OB484	male	34.877	GG	ob	182.5	135	40.5329	49.1	186	118	30	14	29	44	38.4	44.9	131	124	1.05645
OB486	male	5.357	GT	ob	169.5	153.2	53.3236	50.6	149	98	27	29	39	40	44.2	44.1	156	138	1.13043
OB488	female	2.723	GT	non-ob	164.6	46.4	17.1261	23	101	74	17	10	9	15	20.3	58.4	61	83	0.73494
OB495	female	0.828	GG	ob	164.2	107.7	39.9456	62.1	167	90	28	23	27	37	49.5	39.7	122.5	134	0.914179
OB497	female	8.414	TT	ob	157.6	119.3	48.0317	70	164	87	33	24		41	55.2	37.7	132	145	0.910345
OB500	female	4.449		non-ob	155.6	43.5	17.9668	25.2	96	67	10	6	11	10	22.8	60.2	61	82	0.743902
OB501	female	4.343	TT	non-ob	160	57.3	22.3828	25	113	78	13	7	10	10	20.2	58.1	75	88	0.852273
OB502	female	9.925	GT	ob	159.4	125	49.1964	49.9	184	118	34	27	29	34	55.6	35.6	126	149	0.845638
OB505	male	14.014	TT	ob	166.3	119.3	43.1376	55.4	119	86	21	14	29	39	41.5	43.5	134	118	1.13559
OB508	male	0.755	GT	ob	171.6	131.6	44.6911	60.5	169	114	39	30	28	47	42.4	43.7	141	134	1.05224
OB510	female	1.337	GT	ob	156.7	105.3	42.8835	61.9	137	87	28	27	31	29	49.7	41.2	128	133	0.962406
OB511	male	20.719	GT	ob	174.9	95.4	31.1867	64.7	190	85	12	11	11	17	20.8	62.6	113	109	1.0367
OB513	female	0.79	GG	non-ob	157.3	49.4	19.965	23.7	97	54	16	8	13	15	21.1	58.5	69	88	0.784091
